# Supplementary material for: Enhanced photocatalytic hydrogen production in water under visible light using noble metal-free ferrous phosphide as an active cocatalyst
Source: Royal Society of Chemistry journal article supplement (doi:10.1039/c5cy01293g), 2015-01-01
Supplement: c5cy01293g1.pdf [file c5cy01293g1.pdf]

***Supporting Information***

**Enhanced Photocatalytic Hydrogen Production in Water under  
Visible Light Using Noble-Metal-Free Ferrous Phosphide as an  
Active Cocatalyst**

Zijun Sun, Huanlin Chen, Qiang Huang, Pingwu Du\*

Key Laboratory of Materials for Energy Conversion, Chinese Academy of Sciences,  
Department of Materials Science and Engineering, *i*ChEM (Collaborative Innovation  
Center of Chemistry for Energy Materials), University of Science and Technology of  
China, No. 96 Jinzhai Road, Hefei, Anhui Province, 230026, P. R. China

\*To whom correspondence should be addressed

E-mail: [dupingwu@ustc.edu.cn](mailto:dupingwu@ustc.edu.cn)

Tel/Fax: 86-551-63606207

## Experimental details

**Materials.** All the chemicals, including cadmium chloride hemipentahydrate ( $\text{CdCl}_2 \cdot 2.5\text{H}_2\text{O}$ , 99.0%), thiourea ( $\text{NH}_2\text{CSNH}_2$ , 99.0%), ethylenediamine ( $\text{C}_2\text{H}_4(\text{NH}_2)_2$ , 99.0%), iron chloride hexahydrate ( $\text{FeCl}_3 \cdot 6\text{H}_2\text{O}$ , 99.0%), sodium sulfate ( $\text{Na}_2\text{SO}_4$ , 99.0%), sodium hypophosphite monohydrate ( $\text{NaH}_2\text{PO}_2 \cdot \text{H}_2\text{O}$ , 98.0%), and ascorbic acid (AA, 99.7%), were obtained from Aldrich or Acros and used without further purification.

Preparation of the CdS NRs: CdS NRs were synthesized according to the reported literature described elsewhere.<sup>1-2</sup>

Preparation of  $\text{Fe}_2\text{P}$ : 0.8 g  $\text{FeCl}_3 \cdot 6\text{H}_2\text{O}$  and 0.48 g  $\text{Na}_2\text{SO}_4$  were dissolved in 70 mL distilled water and the solution was then transferred to a 100 mL Teflon-lined, stainless-steel autoclave, which was maintained at 120 °C for 6 h. After cooling down to room temperature, the as-synthesized material in the autoclave was collected and washed by absolute ethanol and distilled water five times each and dried under vacuum at room temperature overnight. After that, 0.3 g as-synthesized material and 3.0 g  $\text{NaH}_2\text{PO}_2 \cdot \text{H}_2\text{O}$  were mixed together and annealed at 300 °C for 2 h in Ar flow to obtain the final  $\text{Fe}_2\text{P}$  sample.

Preparation of the  $\text{Fe}_2\text{P}/\text{CdS}$  NRs photocatalyst: the  $\text{Fe}_2\text{P}$  and CdS NRs were mixed by grinding and then annealed at 200 °C for 2 h in Ar flow. The weight ratio of  $\text{Fe}_2\text{P}$  in  $\text{Fe}_2\text{P}/\text{CdS}$  NRs is 2%, 5%, 10%, 20%, 30%, 50%, 80%.

**Characterization.** The powder X-ray diffraction (XRD) was measured by X-ray diffraction (XRD, D/max-TTR III) using graphite monochromatized  $\text{Cu K}\alpha$  radiation

of 1.54178 Å, operating at 40 kV and 200 mA. The scanning rate was 5° min<sup>-1</sup> in 2θ. The scanning electron microscopy (SEM) measurements were conducted using a JSM-6700F. High-resolution transmission electron microscopy (HRTEM) images and energy-dispersive X-ray analysis (EDX) were obtained with a JEM-2010 electron microscope equipped with a Rontec EDX system. The UV-Vis absorption was performed on a SOLID 3700 UV-Vis-NIR spectrophotometer. The photoluminescence (PL) spectra for solid samples were investigated through JY Fluorolog-3-Tou.

**Photoelectrochemical Measurements.** Photocurrent measurements were performed on a CHI 602E electrochemical work station (Chenhua Instrument, Shanghai, China) in a standard three-electrode with the photocatalyst-coated FTO as the working electrode, an Ag/AgCl as a reference electrode, and Pt wire as the counter electrode. A 300 W Xenon lamp with a UV cut-off filter ( $\lambda > 420$  nm) was used as the light source. A 0.5 M Na<sub>2</sub>SO<sub>4</sub> solution was used as the electrolyte. The working electrodes were prepared by dropping a suspension (20 μL) made of Fe<sub>2</sub>P/CdS and CdS (the concentration of Fe<sub>2</sub>P/CdS and CdS being 20 mg/mL) onto the surface of a FTO plate. The working electrodes were dried at room temperature. The photoresponses of the samples as light on and off were measured at 0.0 V.

**Photocatalytic hydrogen evolution.** The photocatalytic hydrogen evolution experiments were carried out in a 50 mL flask with stirring at ambient temperature. A 300 W Xenon arc lamp through a UV cut-off filter ( $\lambda > 420$  nm), which was positioned at 15 cm away from the reactor, was used as a visible light source for the photocatalytic reaction. The total intensity on the flask was *ca.* 1400 mw. 1.0 mg of the photocatalyst

was dispersed in 20 mL of aqueous solution containing 0.5 M ascorbic acid as sacrificial reagents, and pH adjust to 4.2 by NaOH. And then the suspension was stirred and purged with nitrogen for 30 min to remove air. Then, 5 mL of nitrogen was removed from the flask, followed by injecting 5 mL of methane (760 Torr) to serve as the internal standard. Hydrogen gas was measured by gas chromatography (SP-6890, nitrogen as a carrier gas) using a thermal conductivity detector (TCD). For each evaluation of hydrogen generation, 100  $\mu$ L of the headspace was injected into the GC and was quantified by a calibration plot to the internal CH<sub>4</sub> standard.<sup>3</sup> The hydrogen evolution rate was calculated based on the Fe<sub>2</sub>P/CdS NRs photocatalyst.

Apparent quantum yields (*A.Q.Y.*,  $\phi$ ) defined by the following equation were measured using a 450 nm ( $\pm$  5 nm) band-pass filter and an irradiatometer:

$$\begin{aligned} A.Q.Y.(%) &= \frac{\text{number of reacted electrons}}{\text{number of incident photons}} \times 100\% \\ &= \frac{\text{number of evolved } H_2 \text{ molecules} \times 2}{\text{number of incident photons}} \times 100\% \end{aligned}$$

## References

- (1) Jang, J. S.; Joshi, U. A.; Lee, J. S. *J. Phys. Chem. C* **2007**, *111*, 13280-13287.
- (2) Sun, Z.; Yue, Q.; Li, J.; Xu, J.; Zheng, H.; Du, P. *J. Mater. Chem. A* **2015**, *3*, 10243-10247.
- (3) Du, P., J.; Jarosz, P.; Zhang, J.; Brennessel, W. W.; Eisenberg, R. *J. Phys. Chem. B*. **2007**, *111*, 6887-6894.

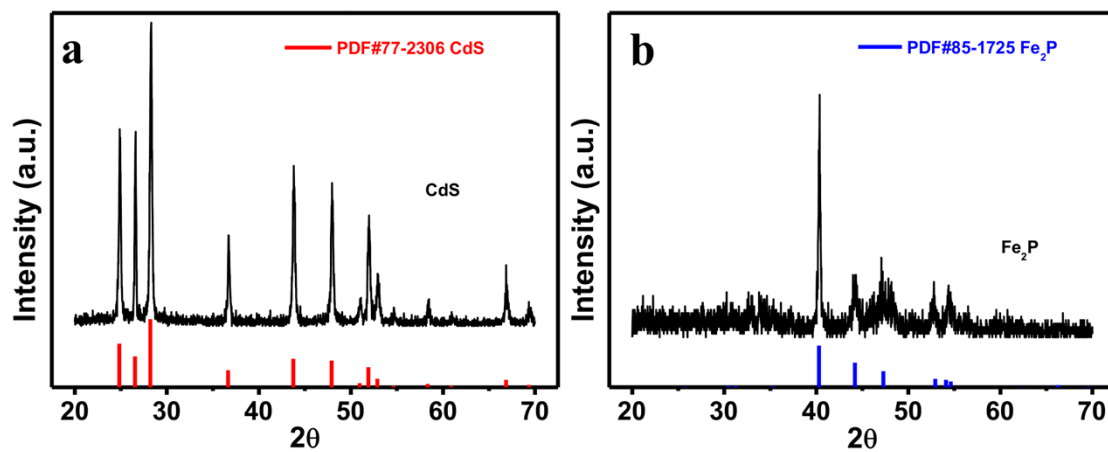

Figure S1. Powder XRD patterns of (a) CdS and (b) Fe<sub>2</sub>P.

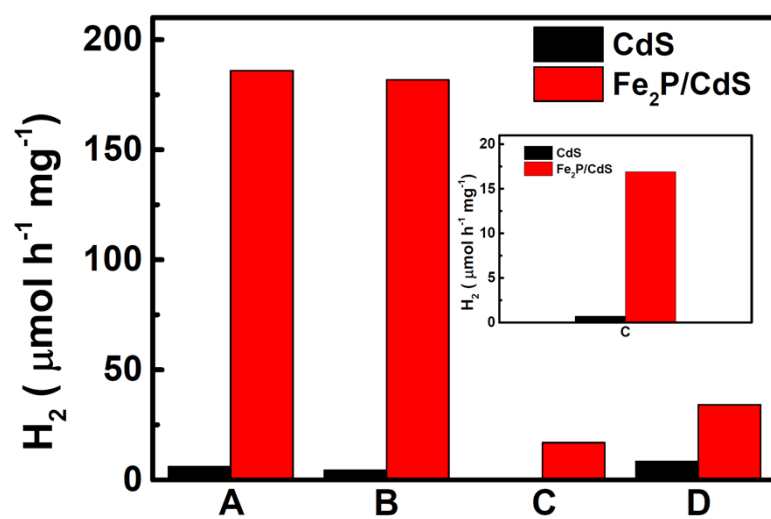

**Figure S2.** Photocatalytic  $\text{H}_2$  production rate of CdS and 30 wt%  $\text{Fe}_2\text{P/CdS}$  in the presence of different electron donors: (A) 0.5 M ascorbic acid, pH=4.2; (B) 10% lactic acid; (C) 10% TEOA; (D) 0.25 M  $\text{Na}_2\text{S}/0.35$  M  $\text{Na}_2\text{SO}_3$ .

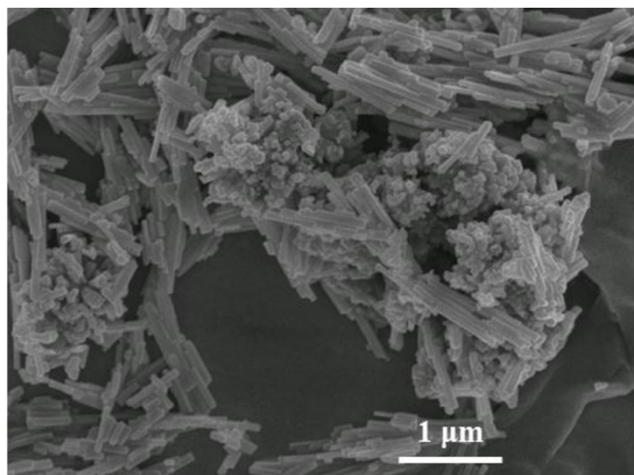

**Figure S3.** SEM image of Fe<sub>2</sub>P/CdS (30 wt%) after photocatalytic H<sub>2</sub> production.
